# Supplementary material for: Development of Green and Facile Sample Preparation Method for Determination of Seven Neonicotinoids in Fresh Vegetables, and Dissipation and Risk Assessment of Imidacloprid and Dinotefuran
Source: MDPI journal article supplement (doi:10.3390/foods13071106), 2024-04-04
Supplement: s1 [file s1]

## Supporting Information

# Development of green and facile sample preparation method for the determination of seven neonicotinoids in fresh vegetables, and dissipation and risk assessment of imidacloprid and dinotefuran

Osama I Abdallah<sup>1\*</sup>, Rania M. Abd El-Hamid<sup>1</sup>, Nevein S. Ahmed<sup>1</sup>, Saleh S. Alhewairini<sup>2</sup>, Sherif B. Abdel Ghani<sup>2, 3\*</sup>

<sup>1</sup> Department of Pesticide Residues and Environmental Pollution, Central Agricultural Pesticide Laboratory, Agricultural Research Center, Giza, 12618, Egypt.

<sup>2</sup> Department of Plant Protection, College of Agriculture and Food, Qassim University, P.O. Box 6622, Buraydah, Saudi Arabia.

<sup>3</sup> Department of Plant Protection, Faculty of Agriculture, Ain Shams University, P.O. Box 68 Hadayek Shoubra, 11241 Cairo, Egypt.

\* Corresponding author.

*E-mail addresses:* [oiabdullah@qassim.gov.sa](mailto:oiabdullah@qassim.gov.sa) (O. I. A.), [sherifbiomy@yahoo.com](mailto:sherifbiomy@yahoo.com) (S. B. A.)

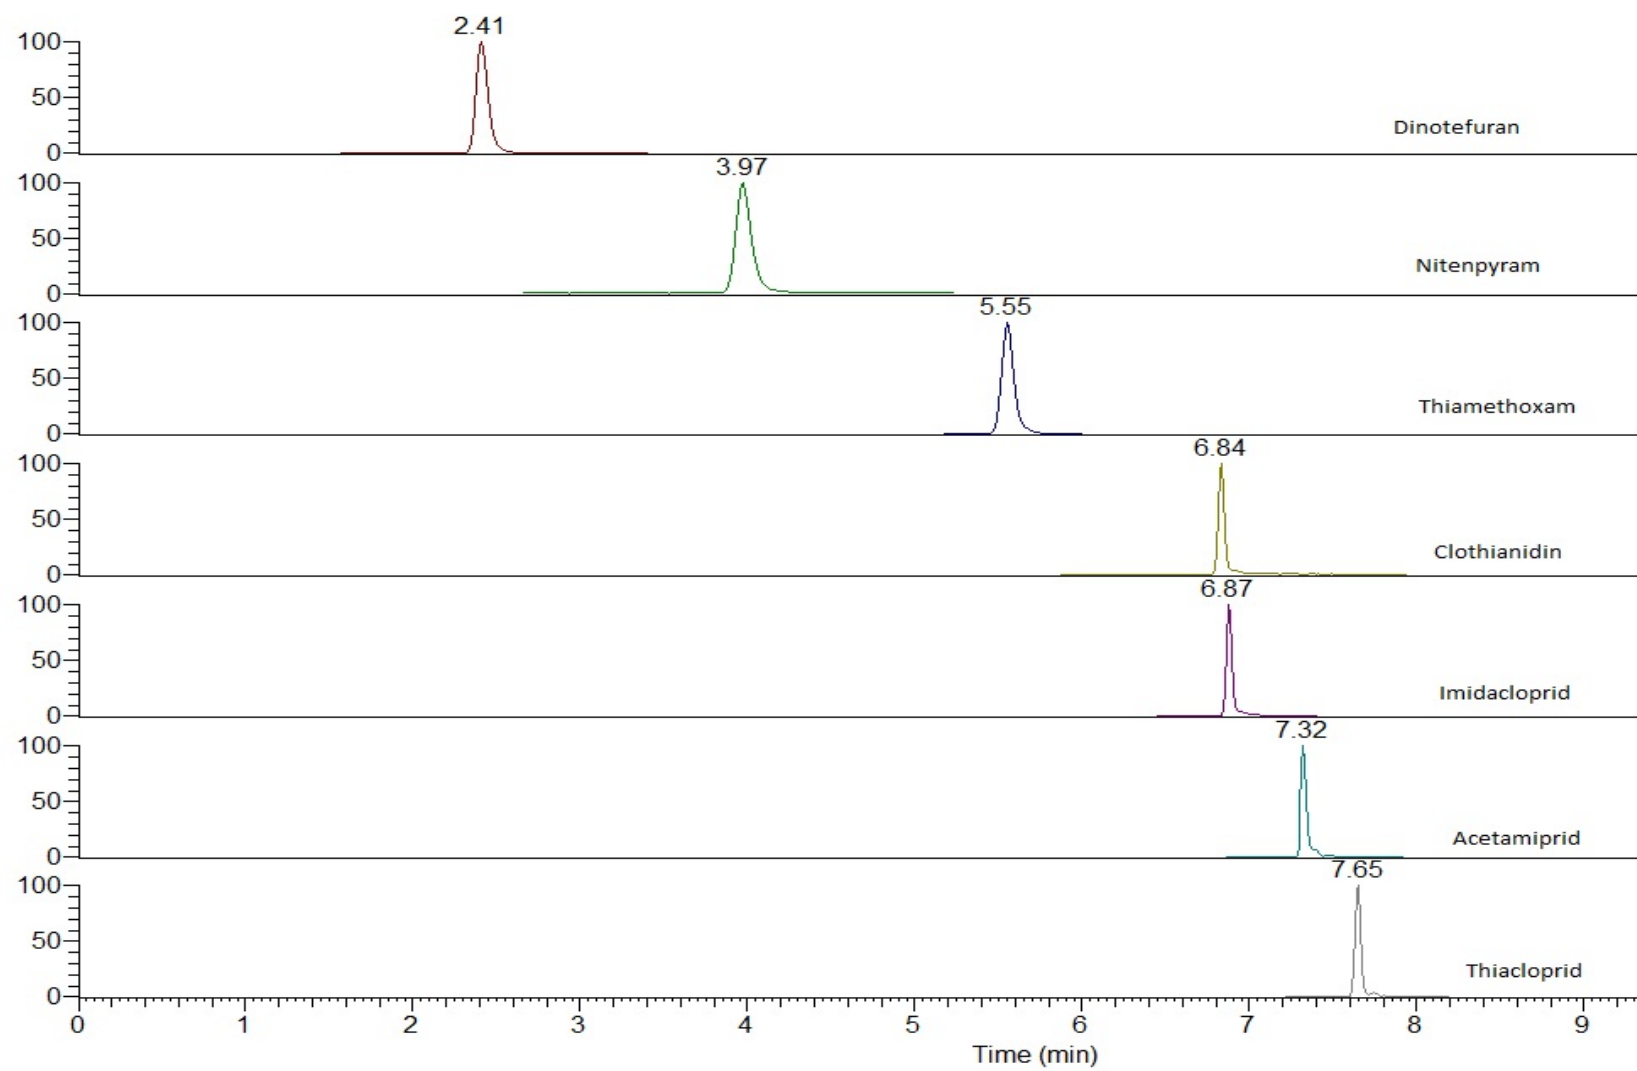

**Figure S1.** Representative chromatograms of the 7 separated neonicotinoids at concentration of 0.01  $\mu$ g/L in DI water using LC-MS/MS

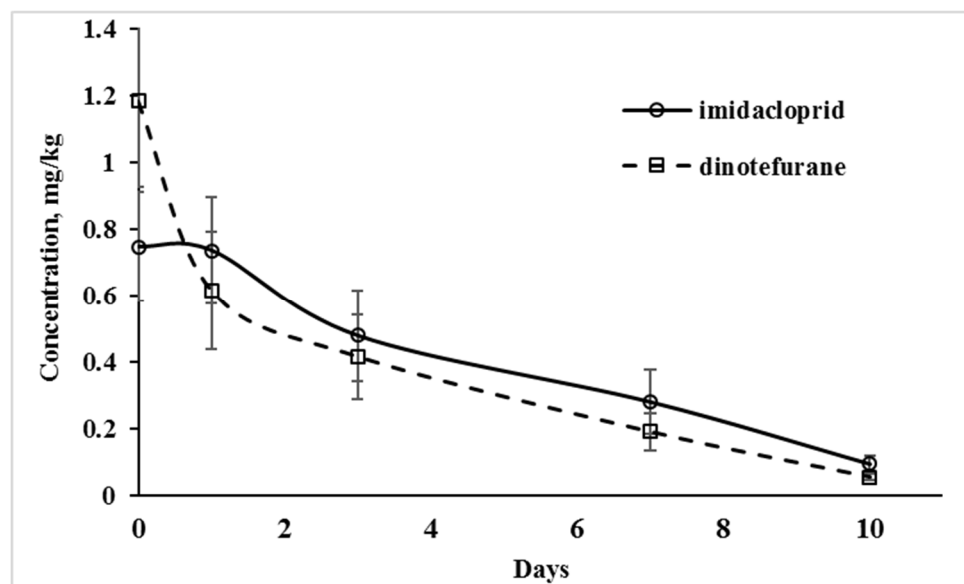

**Figure S2.** Residues of imidacloprid and dinotefuran in tomatoes under field conditions.

**Table S1.** LC–MS/MS parameters for determination of neonicotinoids

|              | Retention Time<br>(min) | Precursor<br>(m/z) | Product<br>(m/z)          | Collision<br>Energy<br>(V) | RF Lens<br>(V) |
|--------------|-------------------------|--------------------|---------------------------|----------------------------|----------------|
| Dinotefuran  | 2.51                    | 203                | 113.1                     | 10.2                       | 36             |
|              |                         |                    | <b>129.05<sup>a</sup></b> | 12.4                       | 36             |
| Nitenpyram   | 4.11                    | 271.06             | 189.1                     | 14.2                       | 50             |
|              |                         |                    | <b>225.1</b>              | 12.09                      | 50             |
| Thiamethoxam | 5.67                    | 292.08             | 181.08                    | 23.7                       | 40             |
|              |                         |                    | <b>211.1</b>              | 12.3                       | 40             |
| Clothianidin | 6.88                    | 250.03             | 131.9                     | 17.09                      | 46             |
|              |                         |                    | <b>169.05</b>             | 13.2                       | 46             |
| Imidacloprid | 6.91                    | 256.1              | 175.08                    | 20.08                      | 50             |
|              |                         |                    | <b>209.1</b>              | 16.7                       | 50             |
| Acetamiprid  | 7.34                    | 223.03             | 90.07                     | 34.7                       | 52             |
|              |                         |                    | <b>125.9</b>              | 21.6                       | 52             |
| Thiacloprid  | 7.66                    | 253                | 99.04                     | 42.2                       | 59             |
|              |                         |                    | <b>126.04</b>             | 21.8                       | 59             |

<sup>a</sup> Product ions in bold were utilized for quantification

**Table S2.** Comparison of the extraction/clean-up step, recovery, and LOQ of neonicotinoids in the previous studies with the current study

| No of analytes | Matrices                                         | Instrument      | Extraction/cleanup                                                                                                                                                                                                   | % Recovery | LOQ ( $\mu\text{g/kg}$ ) | Ref.       |
|----------------|--------------------------------------------------|-----------------|----------------------------------------------------------------------------------------------------------------------------------------------------------------------------------------------------------------------|------------|--------------------------|------------|
| 5              | Vegetables and fruits                            | LC-MS (APCI)    | -Sample weight: 20 g<br>-Extraction solvents: 95 mL methanol<br>-Clean-up: SPE cartridge                                                                                                                             | 70-95      | 10 (20 for nitenpyram)   | [30]       |
| 5              | Apple                                            | LC-MS/MS (APCI) | -Sample weight: 10 g<br>-Extraction solvents: 10 mL acetonitrile, followed by salting out step.<br>-Clean-up: dSPE using primary secondary amine (PSA)                                                               | 93-108     | 2-3                      | [33]       |
| 3              | Cabbage, Tomatoes, Chilli, Peppers, and Potatoes | HPLC-UV         | -Sample weight: 1 g<br>-Extraction solvents: Microwave Assisted Extraction (MAE), acetone, n-hexane, and $\text{CH}_2\text{Cl}_2$                                                                                    | 68.1-106   | 3.2-4.8                  | [32]       |
| 4              | Tomatoes<br>Cucumber                             | HPLC-UV         | -Sample weight: 10 g (DSPE)<br>-Extraction solvents: 10 mL acetonitrile, followed by salting out step.<br>-Clean-up: dSPE using PSA and MWCNTs, followed by DLLME<br>-Procedure for enrichment using $\text{CHCl}_3$ | 84.6-97.5  | 0.5-1                    | [34]       |
| 6              | Spinach, Cucumber, Apple, and Pomelo             | LC-MS/MS        | -Sample weight: 10 g<br>-Extraction solvents: 10 mL acetonitrile, then salting out<br>-Clean-up: dSPE using primary secondary amine (PSA) and graphitized carbon black (GCB)                                         | 73.7-103.8 | 0.66-2.84                | [35]       |
| 4              | cereals, vegetables, fruits                      | UPLC-MS/MS      | -Sample weight: 10 g<br>-Extraction solvents: 5 mL water and 10 mL acetonitrile, followed by salting out step.<br>-Clean-up: dSPE using primary secondary amine (PSA) and graphitized carbon black (GCB)             | 82.7-103.4 | 0.71-2.26                | [31]       |
| 7              | Cucumber, Eggplant                               | HPLC-UV         | -Sample weight: 5 g<br>-Extraction solvents: 25 mL water<br>-Clean-up: SPE, Oasis HLB, and Envi-Carb cartridges                                                                                                      | 82-114     | 7-17, 3-19               | [36]       |
| 4              | Diverse crops                                    | HPLC-UV         | -Sample weight: 10 g<br>-Extraction solvents: 5 mL water and 5 mL acetonitrile, followed by salting out step.<br>-Clean-up: dSPE using PSA and GCB.                                                                  | 77.5-96.4  | 0.2 $\mu\text{g/mL}$     | [37]       |
| 7              | Tomatoes<br>Cucumber<br>Lettuce                  | UPLC-MS/MS      | -Sample weight: 3 g<br>-Extraction solvents: 27 mL water<br>-No cleanup step.                                                                                                                                        | 91.9-113.7 | 10                       | This study |
